# Supplementary material for: Volumes of brain structures in captive wild-type and laboratory rats: 7T magnetic resonance in vivo automatic atlas-based study
Source: PubMed Central journal article supplement (PMC6459519; doi:10.1371/journal.pone.0215348), 2019-04-11

**S1 Figure.** Visualization of the manual segmentation of the hippocampus (A-C) and the olfactory bulbs (D-F) in WWCPS (A, D), BN (B, E) and Wistar rats (C, F).

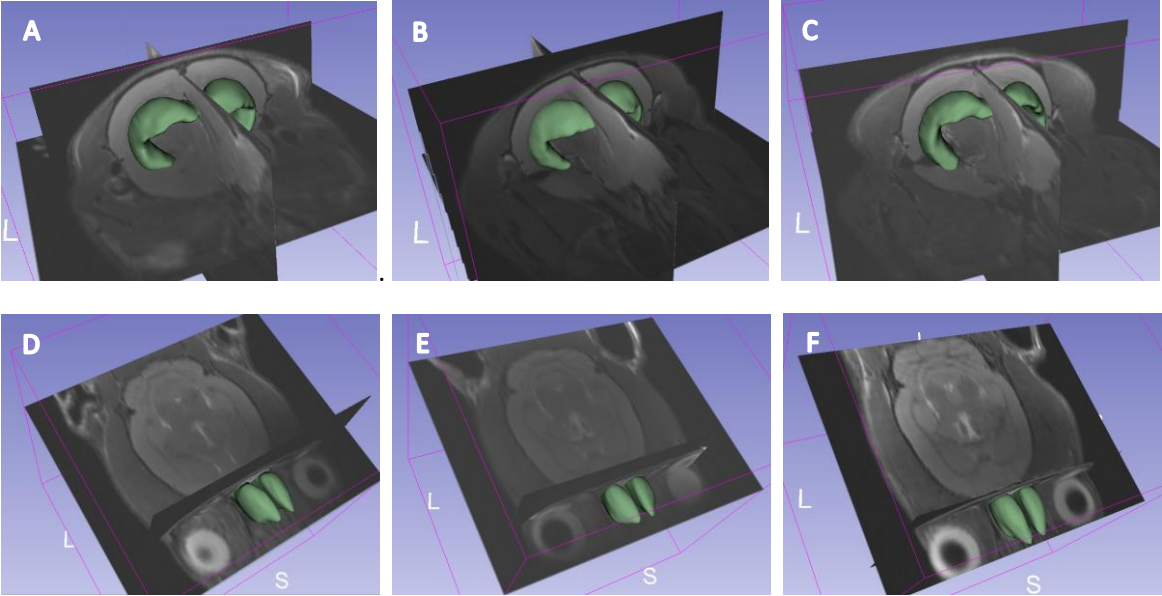

Supplement: pone.0215348.s006.pdf [file pone.0215348.s006.pdf]
